# Supplementary material
Source: ML conference proceedings conference paper supplement (https://proceedings.neurips.cc/paper_files/paper/2022/hash/4446b84fdf15b17c091582e4b86f8a05-Abstract.html)
Supplement: Supplementary file 1 [file 4446b84fdf15b17c091582e4b86f8a05-Supplemental-Conference.zip]

Archive with 141 entries (89 files):
- camera_ready_full-17-23.pdf
- TLB_Code/
- TLB_Code/.git/
- TLB_Code/.git/index
- TLB_Code/.git/info/
- TLB_Code/.git/info/exclude
- TLB_Code/.git/description
- TLB_Code/.git/COMMIT_EDITMSG
- TLB_Code/.git/HEAD
- TLB_Code/.git/logs/
- TLB_Code/.git/logs/HEAD
- TLB_Code/.git/logs/refs/
- TLB_Code/.git/logs/refs/remotes/
- TLB_Code/.git/logs/refs/remotes/origin/
- TLB_Code/.git/logs/refs/remotes/origin/master
- TLB_Code/.git/logs/refs/heads/
- TLB_Code/.git/logs/refs/heads/master
- TLB_Code/.git/branches/
- TLB_Code/.git/objects/
- TLB_Code/.git/objects/b7/
- TLB_Code/.git/objects/b7/592014320b7314d5a51755c3e866f5fb5bf4ab
- TLB_Code/.git/objects/b3/
- TLB_Code/.git/objects/b3/079ee8402cda9ca3cd465d49314d56c4545d33
- TLB_Code/.git/objects/58/
- TLB_Code/.git/objects/58/96b1deae2f54268c084074cd77e1d9f6470e09
- TLB_Code/.git/objects/c4/
- TLB_Code/.git/objects/c4/17eef209893949a82131ca05321c1061c0ebc1
- TLB_Code/.git/objects/d1/
- TLB_Code/.git/objects/d1/3caf15a1348cff3bccf2a265ecdcece35b653c
- TLB_Code/.git/objects/45/
- TLB_Code/.git/objects/45/8d3bfad8d11ce6c8cf18e0a6da118c5e79a945
- TLB_Code/.git/objects/86/
- TLB_Code/.git/objects/86/02c0c449663c55c689374995418c3dbc3bc596
- TLB_Code/.git/objects/cf/
- TLB_Code/.git/objects/cf/43ed301cf2b2d0c8c7dac7a8e0e126d86c56d8
- TLB_Code/.git/objects/info/
- TLB_Code/.git/objects/5a/
- TLB_Code/.git/objects/5a/accc730b85cf5d9f3ba243192e65d1babf9e26
- TLB_Code/.git/objects/76/
- TLB_Code/.git/objects/76/110a059efa9fd587c9d0c9fc0921b2ee3d08d2
- TLB_Code/.git/objects/ff/
- TLB_Code/.git/objects/ff/3cafc638746a1935a23f5d24cf8ea465422092
- TLB_Code/.git/objects/55/
- TLB_Code/.git/objects/55/c4b72cfd366f6472e360cba72c1faa99d0ec61
- TLB_Code/.git/objects/1b/
- TLB_Code/.git/objects/1b/5204cda6c32cb6b13843459c2c2ba15820b931
- TLB_Code/.git/objects/23/
- TLB_Code/.git/objects/23/50c88893b6c63792fa988d06358bebb7758118
- TLB_Code/.git/objects/2e/
- TLB_Code/.git/objects/2e/ae6c0bc2b78b062c1f6f5161b0dcd051db3b70
- TLB_Code/.git/objects/4d/
- TLB_Code/.git/objects/4d/333a7615165e5be91627e8794261a91fe4f403
- TLB_Code/.git/objects/9c/
- TLB_Code/.git/objects/9c/7e10589258ce21448990784d39a560d53f8dbb
- TLB_Code/.git/objects/cc/
- TLB_Code/.git/objects/cc/2243532a9273763e5b3def363a3175a84b97a5
- TLB_Code/.git/objects/4e/
- TLB_Code/.git/objects/4e/5f394f2eb4443ce216faff769602f553ea7bca
- TLB_Code/.git/objects/2f/
- TLB_Code/.git/objects/2f/f005904ade79248a0336f2db47e1422d2c5350
- TLB_Code/.git/objects/2f/38454f09652050dbc7e9e9e7aeef200af67a2e
- TLB_Code/.git/objects/21/
- TLB_Code/.git/objects/21/36e6fc562b46fddadcf8b88333f7de3f49feda
- TLB_Code/.git/objects/pack/
- TLB_Code/.git/objects/e6/
- TLB_Code/.git/objects/e6/9de29bb2d1d6434b8b29ae775ad8c2e48c5391
- TLB_Code/.git/objects/f7/
- TLB_Code/.git/objects/f7/55f4aee8ac6b8cc06b6ca884c9c4bb208591e0
- TLB_Code/.git/objects/51/
- TLB_Code/.git/objects/51/0580bb97ff02d49878eacb4a8f67a804514494
- TLB_Code/.git/objects/94/
- TLB_Code/.git/objects/94/3b0607a2df4b8332a4b0e69fd2f6fb5271aa9d
- TLB_Code/.git/objects/24/
- TLB_Code/.git/objects/24/ac5ae72793aeeb4613823d66990df54bb17261
- TLB_Code/.git/objects/24/3128ff8d69de61a9b191837b761761789bd789
- TLB_Code/.git/objects/eb/
- TLB_Code/.git/objects/eb/c059de1199b4a8556772ccf242f32aa3a28040
- TLB_Code/.git/objects/3e/
- TLB_Code/.git/objects/3e/8076bbe1b591532354c93e70a42ada66fa8946
- TLB_Code/.git/objects/69/
- TLB_Code/.git/objects/69/25e7b8f5589abd711e6bbe5c41b20ea588811c
- TLB_Code/.git/objects/ec/
- TLB_Code/.git/objects/ec/f4e18ddf3eb3884fba14cfcc964d3ab55589f3
- TLB_Code/.git/objects/c5/
- TLB_Code/.git/objects/c5/191702b96369e48c12700885b0c87a7af8d90c
- TLB_Code/.git/objects/e8/
- TLB_Code/.git/objects/e8/c8c29edc9ec8dab370b1da4f49e13496728825
- TLB_Code/.git/hooks/
- TLB_Code/.git/hooks/pre-merge-commit.sample
- TLB_Code/.git/hooks/post-update.sample
- TLB_Code/.git/hooks/pre-receive.sample
- TLB_Code/.git/hooks/fsmonitor-watchman.sample
- TLB_Code/.git/hooks/pre-push.sample
- TLB_Code/.git/hooks/applypatch-msg.sample
- TLB_Code/.git/hooks/update.sample
- TLB_Code/.git/hooks/commit-msg.sample
- TLB_Code/.git/hooks/pre-rebase.sample
- TLB_Code/.git/hooks/pre-applypatch.sample
- TLB_Code/.git/hooks/pre-commit.sample
- TLB_Code/.git/hooks/prepare-commit-msg.sample
- TLB_Code/.git/config
- TLB_Code/.git/refs/
- TLB_Code/.git/refs/remotes/
- TLB_Code/.git/refs/remotes/origin/
- TLB_Code/.git/refs/remotes/origin/master
- TLB_Code/.git/refs/tags/
- TLB_Code/.git/refs/heads/
- TLB_Code/.git/refs/heads/master
- TLB_Code/utils/
- TLB_Code/utils/transforms.py
- TLB_Code/utils/dataloader.py
- TLB_Code/utils/__init__.py
- TLB_Code/utils/training_functions.py
- TLB_Code/utils/mix.py
- TLB_Code/utils/sampler.py
- TLB_Code/utils/autoaug.py
- TLB_Code/utils/random_erasing.py
- TLB_Code/utils/print_progress.py
- TLB_Code/utils/drop_path.py
- TLB_Code/utils/losses.py
- TLB_Code/utils/cosine_annealing_with_warmup.py
- TLB_Code/utils/scheduler.py
- TLB_Code/utils/logger_dict.py
- TLB_Code/main.py
- TLB_Code/run.sh
- TLB_Code/README.md
- TLB_Code/requirements.txt
- TLB_Code/models/
- TLB_Code/models/two_stream_transformer.py
- TLB_Code/models/t2t.py
- TLB_Code/models/two_stream_transformer_v2.py
- TLB_Code/models/__init__.py
- TLB_Code/models/two_stream_transformer_v3.py
- TLB_Code/models/create_model.py
- TLB_Code/models/cait.py
- TLB_Code/models/SPT.py
- TLB_Code/models/vit.py
- TLB_Code/models/swinv2.py
- TLB_Code/models/swin.py
- TLB_Code/models/model_parts.py
- TLB_Code/models/pit.py
