# Supplementary material
Source: ML conference proceedings conference paper supplement (https://proceedings.neurips.cc/paper_files/paper/2022/hash/4446b84fdf15b17c091582e4b86f8a05-Abstract.html)
Supplement: Supplementary file 1 [file 4446b84fdf15b17c091582e4b86f8a05-Supplemental-Conference.zip › TLB_Code/README.md]

## Temporal Latent Bottleneck for Image Classification

### Installation

```
pip install -r requirements.txt

```

### Commands

Temporal Latent Bottleneck
```
sh run.sh CIFAR10 two_stream <seed>
sh run.sh CIFAR100 two_stream <seed>
```

ViT

```
sh run.sh CIFAR10 vit <seed>
sh run.sh CIFAR100 vit <seed>
```

Swin Transformer
```
```
sh run.sh CIFAR10 swin <seed>
sh run.sh CIFAR100 swin <seed>
```

```
