# Supplementary material
Source: ML conference proceedings conference paper supplement (https://proceedings.neurips.cc/paper_files/paper/2022/hash/4446b84fdf15b17c091582e4b86f8a05-Abstract.html)
Supplement: Supplementary file 1 [file 4446b84fdf15b17c091582e4b86f8a05-Supplemental-Conference.zip › TLB_Code/requirements.txt]

absl-py==1.0.0
cached-property==1.5.2
cachetools==4.2.4
certifi==2021.10.8
charset-normalizer==2.0.12
cifar10-web==0.0.4
click==8.0.4
cloudpickle==2.0.0
colorama==0.4.4
cycler==0.11.0
dataclasses==0.8
docker-pycreds==0.4.0
einops==0.4.1
gitdb==4.0.9
GitPython==3.1.18
google-auth==2.6.4
google-auth-oauthlib==0.4.6
grpcio==1.44.0
gym==0.21.0
h5py==3.1.0
idna==3.3
imageio==2.15.0
importlib-metadata==4.8.3
importlib-resources==5.4.0
joblib==1.1.0
kiwisolver==1.3.1
kornia==0.6.4
Markdown==3.3.6
matplotlib==3.3.4
numpy==1.19.5
oauthlib==3.2.0
packaging==21.3
pandas==1.1.5
pathtools==0.1.2
Pillow==8.4.0
promise==2.3
protobuf==3.19.4
psutil==5.9.0
pyasn1==0.4.8
pyasn1-modules==0.2.8
pyparsing==3.0.7
python-dateutil==2.8.2
pytz==2022.1
PyYAML==6.0
requests==2.27.1
requests-oauthlib==1.3.1
rsa==4.8
scikit-learn==0.24.2
scipy==1.5.4
sentry-sdk==1.5.10
setproctitle==1.2.3
shortuuid==1.0.8
six==1.16.0
sklearn==0.0
smmap==5.0.0
tabulate==0.8.9
tensorboard==2.8.0
tensorboard-data-server==0.6.1
tensorboard-plugin-wit==1.8.1
threadpoolctl==3.1.0
timm==0.4.12
torch==1.9.0+cu102
torchaudio==0.9.0
torchsummary==1.5.1
torchvision==0.10.0+cu102
tqdm==4.64.0
typing_extensions==4.1.1
urllib3==1.26.9
wandb==0.12.14
Werkzeug==2.0.3
zipp==3.6.0
