# Supplementary material
Source: ML conference proceedings conference paper supplement (https://proceedings.neurips.cc/paper_files/paper/2022/hash/4446b84fdf15b17c091582e4b86f8a05-Abstract.html)
Supplement: Supplementary file 1 [file 4446b84fdf15b17c091582e4b86f8a05-Supplemental-Conference.zip › TLB_Code/run.sh]

#!/bin/bash
#source ../noise_decision_transformer/atari/dt-env/bin/activate
source image-env/bin/activate
export PYTHONUNBUFFERED=1
dataset=$1 # T-IMNET
model=$2 # two_stream, swin, vit
seed=$3

tag=$dataset-$model-$seed


python main.py --model $model --dataset $dataset --seed $seed --tag $tag --print-freq 100 --cm --mu --batch_size 128
