# Supplementary material
Source: ML conference proceedings conference paper supplement (https://proceedings.neurips.cc/paper_files/paper/2022/hash/4446b84fdf15b17c091582e4b86f8a05-Abstract.html)
Supplement: Supplementary file 1 [file 4446b84fdf15b17c091582e4b86f8a05-Supplemental-Conference.zip › TLB_Code/utils/autoaug.py]

# Credits to DeepVoltaire
# github:DeepVoltaire/AutoAugment

import numpy as np
from .transforms import *


class ImageNetPolicy(object):
    """ Randomly choose one of the best 24 Sub-policies on ImageNet.

        Example:
        >>> policy = ImageNetPolicy()
        >>> transformed = policy(image)

        Example as a PyTorch Transform:
        >>> transform=transforms.Compose([
        >>>     transforms.Resize(256),
        >>>     ImageNetPolicy(),
        >>>     transforms.ToTensor()])
    """
    def __init__(self, fillcolor=(128, 128, 128)):
        self.policies = [
            SubPolicy(0.4, "posterize", 8, 0.6, "rotate", 9, fillcolor),
            SubPolicy(0.6, "solarize", 5, 0.6, "autocontrast", 5, fillcolor),
            SubPolicy(0.8, "equalize", 8, 0.6, "equalize", 3, fillcolor),
            SubPolicy(0.6, "posterize", 7, 0.6, "posterize", 6, fillcolor),
            SubPolicy(0.4, "equalize", 7, 0.2, "solarize", 4, fillcolor),

            SubPolicy(0.4, "equalize", 4, 0.8, "rotate", 8, fillcolor),
            SubPolicy(0.6, "solarize", 3, 0.6, "equalize", 7, fillcolor),
            SubPolicy(0.8, "posterize", 5, 1.0, "equalize", 2, fillcolor),
            SubPolicy(0.2, "rotate", 3, 0.6, "solarize", 8, fillcolor),
            SubPolicy(0.6, "equalize", 8, 0.4, "posterize", 6, fillcolor),

            SubPolicy(0.8, "rotate", 8, 0.4, "color", 0, fillcolor),
            SubPolicy(0.4, "rotate", 9, 0.6, "equalize", 2, fillcolor),
            SubPolicy(0.0, "equalize", 7, 0.8, "equalize", 8, fillcolor),
            SubPolicy(0.6, "invert", 4, 1.0, "equalize", 8, fillcolor),
            SubPolicy(0.6, "color", 4, 1.0, "contrast", 8, fillcolor),

            SubPolicy(0.8, "rotate", 8, 1.0, "color", 2, fillcolor),
            SubPolicy(0.8, "color", 8, 0.8, "solarize", 7, fillcolor),
            SubPolicy(0.4, "sharpness", 7, 0.6, "invert", 8, fillcolor),
            SubPolicy(0.6, "shearX", 5, 1.0, "equalize", 9, fillcolor),
            SubPolicy(0.4, "color", 0, 0.6, "equalize", 3, fillcolor),

            SubPolicy(0.4, "equalize", 7, 0.2, "solarize", 4, fillcolor),
            SubPolicy(0.6, "solarize", 5, 0.6, "autocontrast", 5, fillcolor),
            SubPolicy(0.6, "invert", 4, 1.0, "equalize", 8, fillcolor),
            SubPolicy(0.6, "color", 4, 1.0, "contrast", 8, fillcolor),
            SubPolicy(0.8, "equalize", 8, 0.6, "equalize", 3, fillcolor)
        ]

    def __call__(self, img):
        policy_idx = random.randint(0, len(self.policies) - 1)
        return self.policies[policy_idx](img)

    def __repr__(self):
        return "AutoAugment ImageNet Policy"


class CIFAR10Policy(object):
    """ Randomly choose one of the best 25 Sub-policies on CIFAR10.

        Example:
        >>> policy = CIFAR10Policy()
        >>> transformed = policy(image)

        Example as a PyTorch Transform:
        >>> transform=transforms.Compose([
        >>>     transforms.Resize(256),
        >>>     CIFAR10Policy(),
        >>>     transforms.ToTensor()])
    """
    def __init__(self, fillcolor=(128, 128, 128)):
        self.policies = [
            SubPolicy(0.1, "invert", 7, 0.2, "contrast", 6, fillcolor),
            SubPolicy(0.7, "rotate", 2, 0.3, "translateX", 9, fillcolor),
            SubPolicy(0.8, "sharpness", 1, 0.9, "sharpness", 3, fillcolor),
            SubPolicy(0.5, "shearY", 8, 0.7, "translateY", 9, fillcolor),
            SubPolicy(0.5, "autocontrast", 8, 0.9, "equalize", 2, fillcolor),

            SubPolicy(0.2, "shearY", 7, 0.3, "posterize", 7, fillcolor),
            SubPolicy(0.4, "color", 3, 0.6, "brightness", 7, fillcolor),
            SubPolicy(0.3, "sharpness", 9, 0.7, "brightness", 9, fillcolor),
            SubPolicy(0.6, "equalize", 5, 0.5, "equalize", 1, fillcolor),
            SubPolicy(0.6, "contrast", 7, 0.6, "sharpness", 5, fillcolor),

            SubPolicy(0.7, "color", 7, 0.5, "translateX", 8, fillcolor),
            SubPolicy(0.3, "equalize", 7, 0.4, "autocontrast", 8, fillcolor),
            SubPolicy(0.4, "translateY", 3, 0.2, "sharpness", 6, fillcolor),
            SubPolicy(0.9, "brightness", 6, 0.2, "color", 8, fillcolor),
            SubPolicy(0.5, "solarize", 2, 0.0, "invert", 3, fillcolor),

            SubPolicy(0.2, "equalize", 0, 0.6, "autocontrast", 0, fillcolor),
            SubPolicy(0.2, "equalize", 8, 0.6, "equalize", 4, fillcolor),
            SubPolicy(0.9, "color", 9, 0.6, "equalize", 6, fillcolor),
            SubPolicy(0.8, "autocontrast", 4, 0.2, "solarize", 8, fillcolor),
            SubPolicy(0.1, "brightness", 3, 0.7, "color", 0, fillcolor),

            SubPolicy(0.4, "solarize", 5, 0.9, "autocontrast", 3, fillcolor),
            SubPolicy(0.9, "translateY", 9, 0.7, "translateY", 9, fillcolor),
            SubPolicy(0.9, "autocontrast", 2, 0.8, "solarize", 3, fillcolor),
            SubPolicy(0.8, "equalize", 8, 0.1, "invert", 3, fillcolor),
            SubPolicy(0.7, "translateY", 9, 0.9, "autocontrast", 1, fillcolor)
        ]

    def __call__(self, img):
        policy_idx = random.randint(0, len(self.policies) - 1)
        return self.policies[policy_idx](img)

    def __repr__(self):
        return "AutoAugment CIFAR10 Policy"
    
class SVHNPolicy(object):
    """ Randomly choose one of the best 25 Sub-policies on SVHN.
        Example:
        >>> policy = SVHNPolicy()
        >>> transformed = policy(image)
        Example as a PyTorch Transform:
        >>> transform=transforms.Compose([
        >>>     transforms.Resize(256),
        >>>     SVHNPolicy(),
        >>>     transforms.ToTensor()])
    """
    def __init__(self, fillcolor=(128, 128, 128)):
        self.policies = [
            SubPolicy(0.9, "shearX", 4, 0.2, "invert", 3, fillcolor),
            SubPolicy(0.9, "shearY", 8, 0.7, "invert", 5, fillcolor),
            SubPolicy(0.6, "equalize", 5, 0.6, "solarize", 6, fillcolor),
            SubPolicy(0.9, "invert", 3, 0.6, "equalize", 3, fillcolor),
            SubPolicy(0.6, "equalize", 1, 0.9, "rotate", 3, fillcolor),

            SubPolicy(0.9, "shearX", 4, 0.8, "autocontrast", 3, fillcolor),
            SubPolicy(0.9, "shearY", 8, 0.4, "invert", 5, fillcolor),
            SubPolicy(0.9, "shearY", 5, 0.2, "solarize", 6, fillcolor),
            SubPolicy(0.9, "invert", 6, 0.8, "autocontrast", 1, fillcolor),
            SubPolicy(0.6, "equalize", 3, 0.9, "rotate", 3, fillcolor),

            SubPolicy(0.9, "shearX", 4, 0.3, "solarize", 3, fillcolor),
            SubPolicy(0.8, "shearY", 8, 0.7, "invert", 4, fillcolor),
            SubPolicy(0.9, "equalize", 5, 0.6, "translateY", 6, fillcolor),
            SubPolicy(0.9, "invert", 4, 0.6, "equalize", 7, fillcolor),
            SubPolicy(0.3, "contrast", 3, 0.8, "rotate", 4, fillcolor),

            SubPolicy(0.8, "invert", 5, 0.0, "translateY", 2, fillcolor),
            SubPolicy(0.7, "shearY", 6, 0.4, "solarize", 8, fillcolor),
            SubPolicy(0.6, "invert", 4, 0.8, "rotate", 4, fillcolor),
            SubPolicy(0.3, "shearY", 7, 0.9, "translateX", 3, fillcolor),
            SubPolicy(0.1, "shearX", 6, 0.6, "invert", 5, fillcolor),

            SubPolicy(0.7, "solarize", 2, 0.6, "translateY", 7, fillcolor),
            SubPolicy(0.8, "shearY", 4, 0.8, "invert", 8, fillcolor),
            SubPolicy(0.7, "shearX", 9, 0.8, "translateY", 3, fillcolor),
            SubPolicy(0.8, "shearY", 5, 0.7, "autocontrast", 3, fillcolor),
            SubPolicy(0.7, "shearX", 2, 0.1, "invert", 5, fillcolor)
        ]


    def __call__(self, img):
        policy_idx = random.randint(0, len(self.policies) - 1)
        return self.policies[policy_idx](img)

    def __repr__(self):
        return "AutoAugment SVHN Policy"


class SubPolicy(object):
    def __init__(self, p1, operation1, magnitude_idx1, p2, operation2, magnitude_idx2, fillcolor=(128, 128, 128)):
        ranges = {
            "shearX": np.linspace(0, 0.3, 10),
            "shearY": np.linspace(0, 0.3, 10),
            "translateX": np.linspace(0, 150 / 331, 10),
            "translateY": np.linspace(0, 150 / 331, 10),
            "rotate": np.linspace(0, 30, 10),
            "color": np.linspace(0.0, 0.9, 10),
            "posterize": np.round(np.linspace(8, 4, 10), 0).astype(np.int),
            "solarize": np.linspace(256, 0, 10),
            "contrast": np.linspace(0.0, 0.9, 10),
            "sharpness": np.linspace(0.0, 0.9, 10),
            "brightness": np.linspace(0.0, 0.9, 10),
            "autocontrast": [0] * 10,
            "equalize": [0] * 10,
            "invert": [0] * 10
        }

        func = {
            "shearX": ShearX(fillcolor=fillcolor),
            "shearY": ShearY(fillcolor=fillcolor),
            "translateX": TranslateX(fillcolor=fillcolor),
            "translateY": TranslateY(fillcolor=fillcolor),
            "rotate": Rotate(),
            "color": Color(),
            "posterize": Posterize(),
            "solarize": Solarize(),
            "contrast": Contrast(),
            "sharpness": Sharpness(),
            "brightness": Brightness(),
            "autocontrast": AutoContrast(),
            "equalize": Equalize(),
            "invert": Invert()
        }

        self.p1 = p1
        self.operation1 = func[operation1]
        self.magnitude1 = ranges[operation1][magnitude_idx1]
        self.p2 = p2
        self.operation2 = func[operation2]
        self.magnitude2 = ranges[operation2][magnitude_idx2]

    def __call__(self, img):
        if random.random() < self.p1:
            img = self.operation1(img, self.magnitude1)
        if random.random() < self.p2:
            img = self.operation2(img, self.magnitude2)
        return img
