# Supplementary material
Source: ML conference proceedings conference paper supplement (https://proceedings.neurips.cc/paper_files/paper/2022/hash/4446b84fdf15b17c091582e4b86f8a05-Abstract.html)
Supplement: Supplementary file 1 [file 4446b84fdf15b17c091582e4b86f8a05-Supplemental-Conference.zip › TLB_Code/utils/dataloader.py]

import os
from colorama import Fore, Style
import torchvision.transforms as transforms
import torchvision.datasets as datasets

def datainfo(logger, args):
    if args.dataset == 'CIFAR10':
        print(Fore.YELLOW+'*'*80)
        logger.debug('CIFAR10')
        print('*'*80 + Style.RESET_ALL)
        n_classes = 10
        img_mean, img_std = (0.4914, 0.4822, 0.4465), (0.2470, 0.2435, 0.2616)
        img_size = 64
        crop_image_size = 32
        
    elif args.dataset == 'CIFAR100':
        print(Fore.YELLOW+'*'*80)
        logger.debug('CIFAR100')
        print('*'*80 + Style.RESET_ALL)
        n_classes = 100
        img_mean, img_std = (0.5070, 0.4865, 0.4409), (0.2673, 0.2564, 0.2762) 
        img_size = 64
        crop_image_size = 32
        
    elif args.dataset == 'SVHN':
        print(Fore.YELLOW+'*'*80)
        logger.debug('SVHN')
        print('*'*80 + Style.RESET_ALL)
        n_classes = 10
        img_mean, img_std = (0.4377, 0.4438, 0.4728), (0.1980, 0.2010, 0.1970) 
        img_size = 64
        crop_image_size = 32
        
    elif args.dataset == 'T-IMNET':
        print(Fore.YELLOW+'*'*80)
        logger.debug('T-IMNET')
        print('*'*80 + Style.RESET_ALL)
        n_classes = 200
        img_mean, img_std = (0.4802, 0.4481, 0.3975), (0.2770, 0.2691, 0.2821)
        img_size = 64
        crop_image_size = 64
        
    data_info = dict()
    data_info['n_classes'] = n_classes
    data_info['stat'] = (img_mean, img_std)
    data_info['img_size'] = img_size
    data_info['crop_img_size'] = crop_image_size
    data_info['transfer_img_size'] = img_size * 2
    
    return data_info

def dataload(args, augmentations, normalize, data_info):
    if args.dataset == 'CIFAR10':
        train_dataset = datasets.CIFAR10(
            root=args.data_path, train=True, download=True, transform=augmentations)
        val_dataset = datasets.CIFAR10(
            root=args.data_path, train=False, download=False, transform=transforms.Compose([
            transforms.Resize(data_info['img_size']),
            transforms.ToTensor(),
            *normalize]))
        val_dataset_transfer = datasets.CIFAR10(
            root=args.data_path, train=False, download=False, transform=transforms.Compose([
            transforms.Resize(data_info['transfer_img_size']),
            transforms.ToTensor(),
            *normalize]))
        
    elif args.dataset == 'CIFAR100':

        train_dataset = datasets.CIFAR100(
            root=args.data_path, train=True, download=True, transform=augmentations)
        val_dataset = datasets.CIFAR100(
            root=args.data_path, train=False, download=False, transform=transforms.Compose([
            transforms.Resize(data_info['img_size']),
            transforms.ToTensor(),
            *normalize]))
        val_dataset_transfer = datasets.CIFAR100(
            root=args.data_path, train=False, download=False, transform=transforms.Compose([
            transforms.Resize(data_info['transfer_img_size']),
            transforms.ToTensor(),
            *normalize]))
        
    elif args.dataset == 'SVHN':

        train_dataset = datasets.SVHN(
            root=args.data_path, split='train', download=True, transform=augmentations)
        val_dataset = datasets.SVHN(
            root=args.data_path, split='test', download=True, transform=transforms.Compose([
            transforms.Resize(data_info['img_size']),
            transforms.ToTensor(),
            *normalize]))
        val_dataset_transfer = datasets.SVHN(
            root=args.data_path, split='test', download=True, transform=transforms.Compose([
            transforms.Resize(data_info['transfer_img_size']),
            transforms.ToTensor(),
            *normalize]))
        
    elif args.dataset == 'T-IMNET':
        train_dataset = datasets.ImageFolder(
            root=os.path.join(args.data_path, 'tiny_imagenet', 'train'), transform=augmentations)
        val_dataset = datasets.ImageFolder(
            root=os.path.join(args.data_path, 'tiny_imagenet', 'val'), 
            transform=transforms.Compose([
            transforms.Resize(data_info['img_size']), transforms.ToTensor(), *normalize]))
        val_dataset_transfer = datasets.ImageFolder(
            root=os.path.join(args.data_path, 'tiny_imagenet', 'val'), 
            transform=transforms.Compose([
            transforms.Resize(data_info['transfer_img_size']), transforms.ToTensor(), *normalize]))
    
    return train_dataset, val_dataset, val_dataset_transfer
