# Supplementary material
Source: ML conference proceedings conference paper supplement (https://proceedings.neurips.cc/paper_files/paper/2022/hash/4446b84fdf15b17c091582e4b86f8a05-Abstract.html)
Supplement: Supplementary file 1 [file 4446b84fdf15b17c091582e4b86f8a05-Supplemental-Conference.zip › TLB_Code/utils/random_erasing.py]

from __future__ import absolute_import

from torchvision.transforms import *

import random
import math

class RandomErasing(object):
    def __init__(self, probability = 0.5, sl = 0.02, sh = 0.4, r1 = 0.3, mean=[0.4914, 0.4822, 0.4465]):
        self.EPSILON = probability
        self.mean = mean
        self.sl = sl
        self.sh = sh
        self.r1 = r1
       
    def __call__(self, img):

        if random.uniform(0, 1) > self.EPSILON:
            return img

        for _ in range(100):
            area = img.size()[1] * img.size()[2]
       
            target_area = random.uniform(self.sl, self.sh) * area
            aspect_ratio = random.uniform(self.r1, 1/self.r1)

            h = int(round(math.sqrt(target_area * aspect_ratio)))
            w = int(round(math.sqrt(target_area / aspect_ratio)))

            if w < img.size()[2] and h < img.size()[1]:
                x1 = random.randint(0, img.size()[1] - h)
                y1 = random.randint(0, img.size()[2] - w)
                if img.size()[0] == 3:
                    #img[0, x1:x1+h, y1:y1+w] = random.uniform(0, 1)
                    #img[1, x1:x1+h, y1:y1+w] = random.uniform(0, 1)
                    #img[2, x1:x1+h, y1:y1+w] = random.uniform(0, 1)
                    img[0, x1:x1+h, y1:y1+w] = self.mean[0]
                    img[1, x1:x1+h, y1:y1+w] = self.mean[1]
                    img[2, x1:x1+h, y1:y1+w] = self.mean[2]
                    #img[:, x1:x1+h, y1:y1+w] = torch.from_numpy(np.random.rand(3, h, w))
                else:
                    img[0, x1:x1+h, y1:y1+w] = self.mean[1]
                    # img[0, x1:x1+h, y1:y1+w] = torch.from_numpy(np.random.rand(1, h, w))
                return img

        return img
